# Supplementary material for: Ubiquitous Carbohydrate Binding Modules Decorate 936 Lactococcal Siphophage Virions
Source: PubMed Central journal article supplement (PMC6669499; doi:10.3390/v11070631), 2019-07-09
Supplement: viruses-11-00631-s001.pdf [file viruses-11-00631-s001.pdf]

## Ubiquitous Carbohydrate Binding Modules Decorate 936 Lactococcal Siphophages Virions

Stephen Hayes<sup>1</sup>, Jennifer Mahony<sup>1</sup>, Renaud Vincentelli<sup>2,3</sup>, Laurie Ramond<sup>2,3</sup>, Arjen Nauta<sup>4</sup>, Douwe van Sinderen<sup>\*1,5</sup> and Christian Cambillau<sup>\*1,2,3</sup>

Corresponding authors: Douwe van Sinderen or Christian Cambillau

Emails: [d.vansinderen@ucc.ie](mailto:d.vansinderen@ucc.ie) or [ccambillau@gmail.com](mailto:ccambillau@gmail.com)

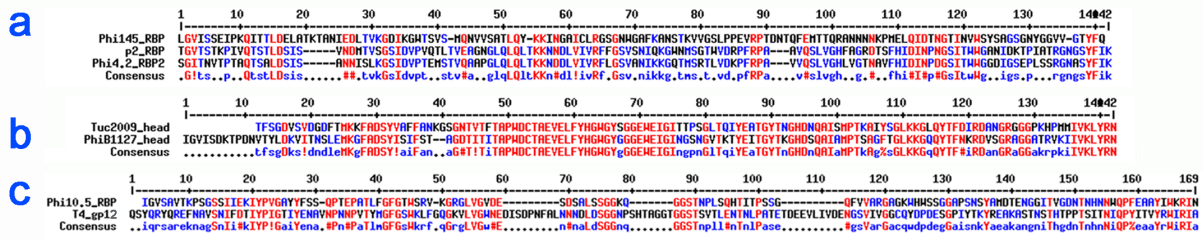

**Figure S1.** Sequence alignment of RBP proteins head domains. **A.** Sequence alignment of the RBP heads of phages Phi145, p2 and Phi4.2, defining the p2 sub-group. **B.** Sequence alignment of the RBP heads of phages Tuc2009 and PhiB1127, defining the Tuc2009-like group. **C.** Sequence alignment of the RBP head of phages Phi10.5 with T4 gp10, defining the T4 p10-like group. The conserved amino acids are in red and the partially conserved in blue. Otherwise in black. Performed with Multalin.

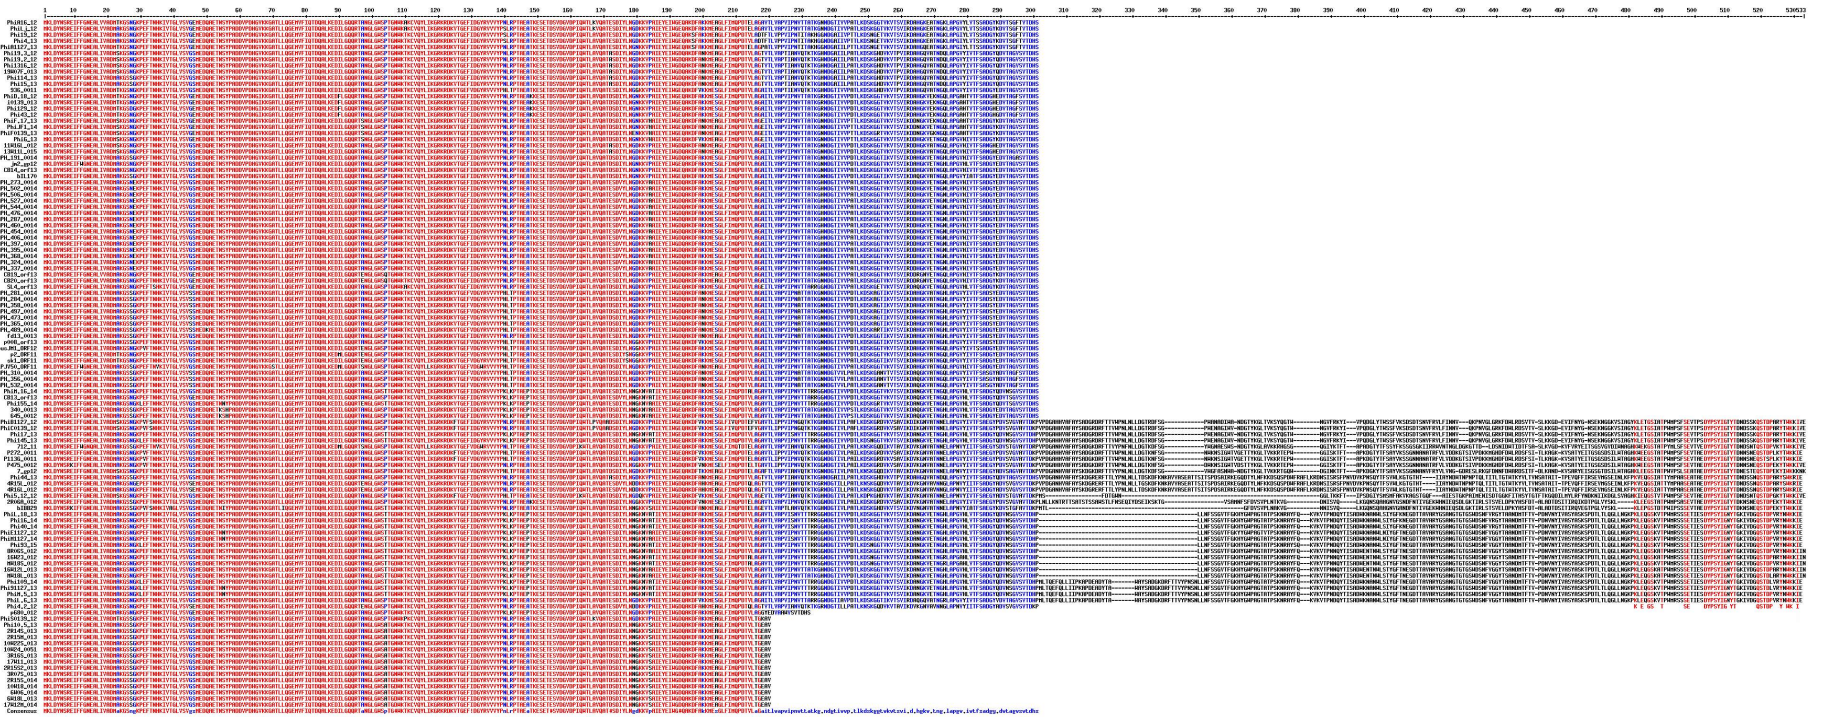

**Figure S2.** Sequence alignment of MTP proteins. The conserved amino acids are in red and the partially conserved in blue. Otherwise in black. Performed with Multalin [1].

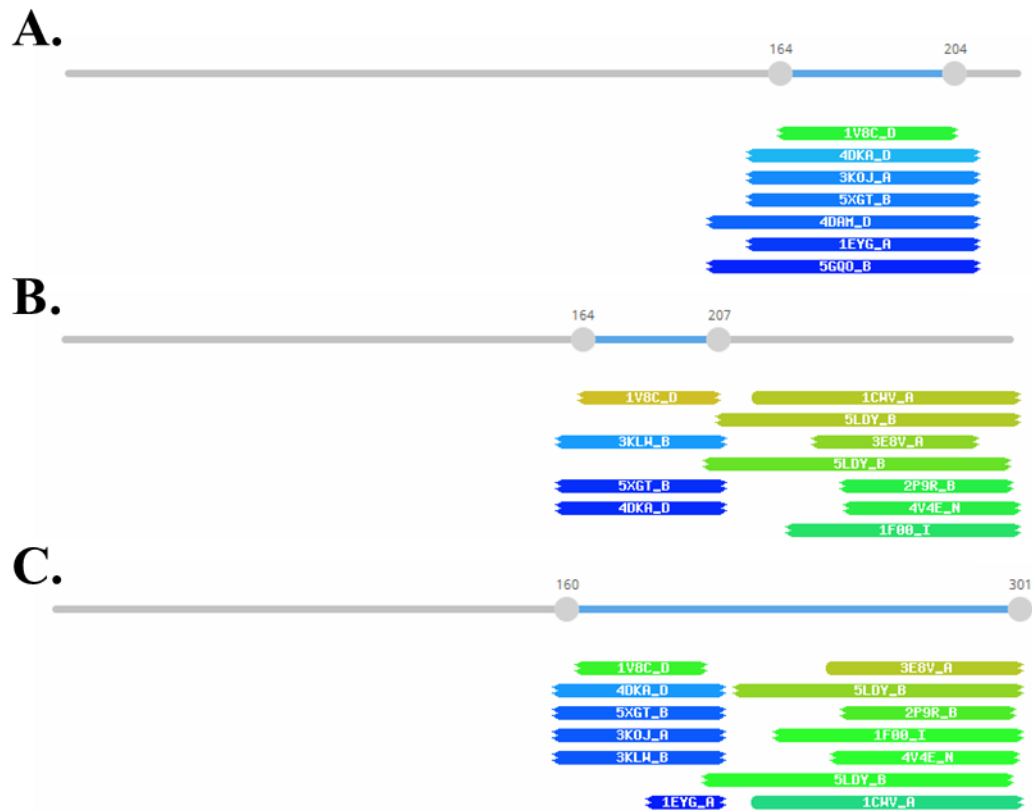

**Figure S3.** HHpred analysis of the core MTP of a representative phage from each of the three major MTP groups, highlighting the lack of structural hits for the first 160 amino acids. **A.** HHpred analysis of the short MTP of Phi10.5. **B.** HHpred analysis of the MTP of p2, a member of the slightly longer second MTP group. **C.** HHpred analysis of the MTP of PhiC0139, a member of the third MTP group.

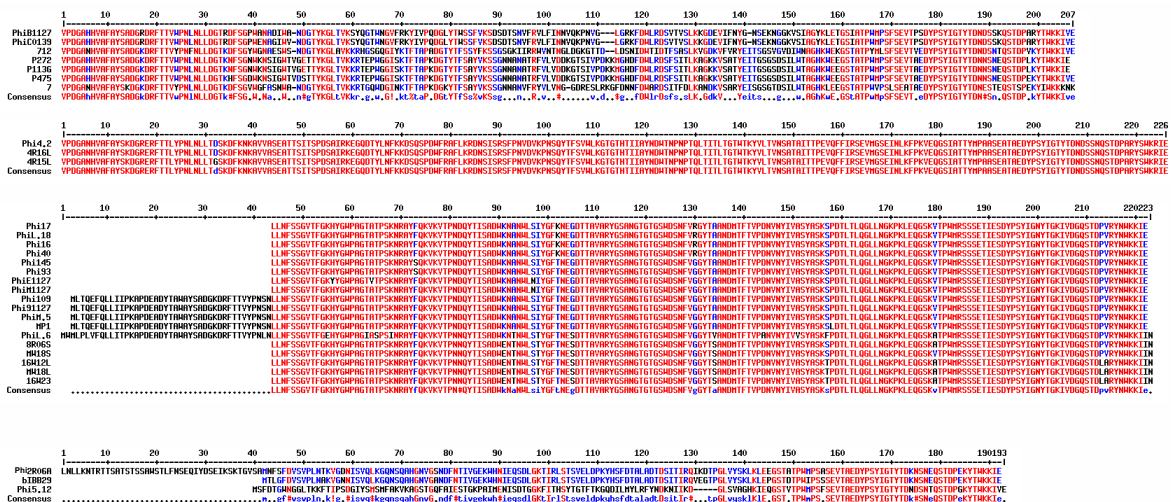

**Figure S4.** Sequence alignment of the MTP extensions of the 936 group of phages, organised by sub-group. The conserved amino acids are in red and the partially conserved in blue. Otherwise in black. Performed with Multalin [1].

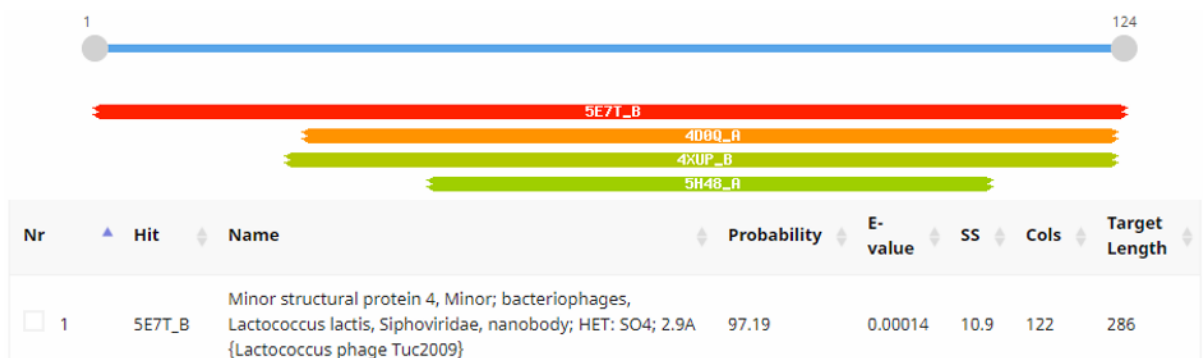

**Figure S5.** HHpred analysis of the MTP extension of p113G, omitting the N and C termini to prevent bias.

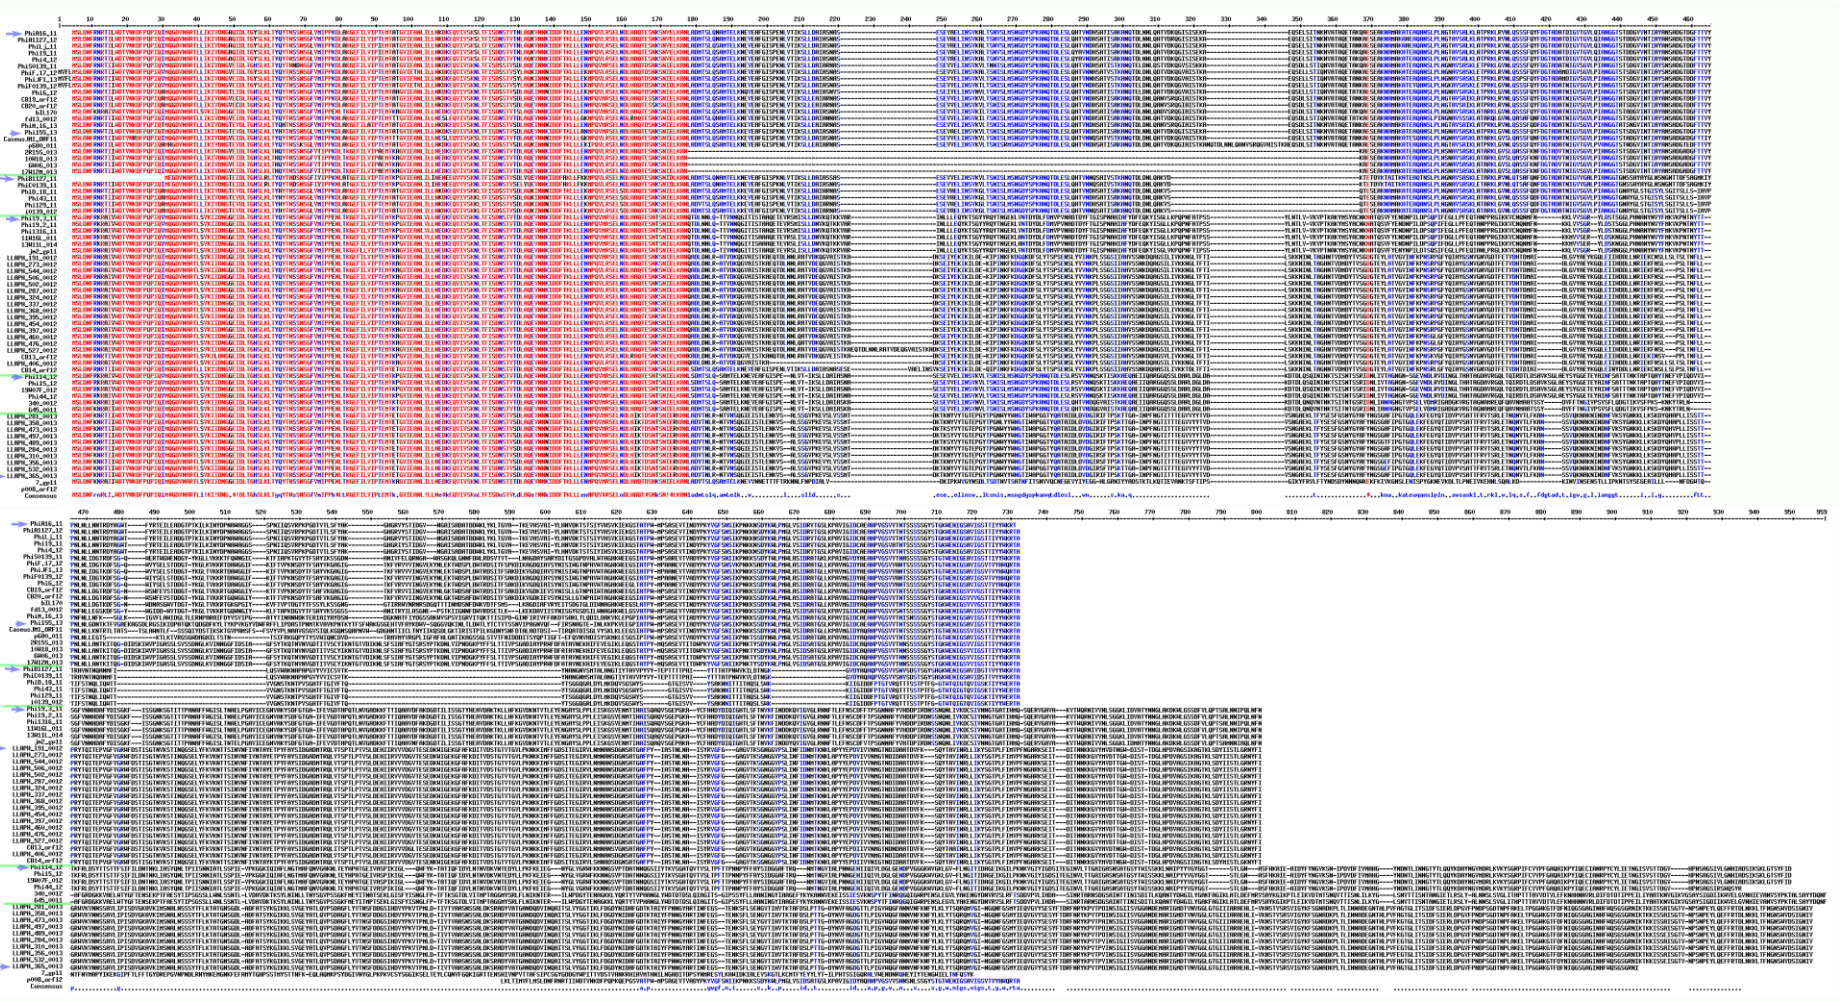

**Figure S6.** Sequence alignment of NPS proteins. The full-length proteins have been aligned. Fully conserved amino-acids are in red and the partially conserved in blue. Otherwise in black. The phages representing each of the 7 groups distinguished by their C-terminal sequences are identified by a blue arrow. Performed using Multalin [1].

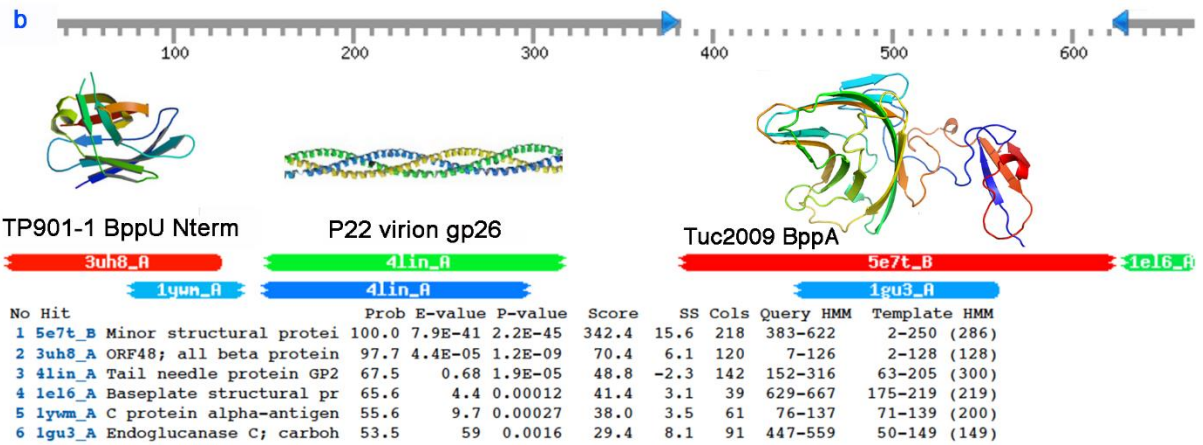

**Figure S7.** HHpred analysis of a NPS from the P335 family lactococcal phage TP901-1. The N-terminus BppU domain, a triple-helix and a BppA module are successively identified.

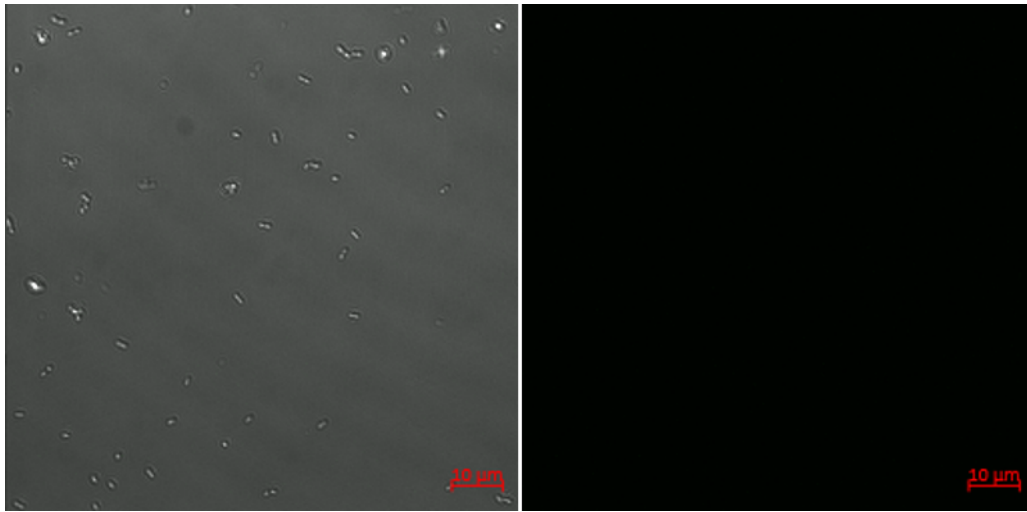

**Figure S8.** Fluorescent binding assay of the GFP-labelled MTP of p2 to NZ9000. A range of protein quantities between 5 – 100  $\mu\text{g}$  were examined. Cells were visualised using differential interference contrast (DIC) microscopy (panels on the left), and fluorescent confocal microscopy (panels on the right) at excitement wavelengths of 488 nm for GFP-labelled proteins. Scale bars correspond to 10  $\mu\text{m}$ .



**Supplementary Table S1.** CBMs of the 936 group of phages.

| Phage     | Accession No. | RBP Head | RBP Group* | Dit <sup>†</sup> | Size (aa) | NPS     | Size (aa) | MTP          | Size (aa) |
|-----------|---------------|----------|------------|------------------|-----------|---------|-----------|--------------|-----------|
| PhiA.16   | KP793102      | p2-like  | Group IV   |                  |           | Group A | 651       |              |           |
| PhiLj     | KP793133      | p2-like  | Group IV   |                  |           | Group A | 652       |              |           |
| PhiA1127  | KP793106      | p2-like  | Group IV   |                  |           | Group A | 652       |              |           |
| Phi19     | KP793103      | p2-like  | Group IV   |                  |           | Group A | 652       |              |           |
| Phi4      | KP793101      | p2-like  | Group IV   |                  |           | Group A | 652       |              |           |
| Phi17     | KP793114      | p2-like  | Group IV   | Class 1          | 491       |         |           | Subgroup III | 179       |
| Phi145    | KM091444      | p2-like  | Group IV   | Class 1          | 491       |         |           | Subgroup III | 179       |
| Phi109    | KP793121      | p2-like  | Group IV   | Class 1          | 491       |         |           | Subgroup III | 220       |
| Phi93     | KM091443      | p2-like  | Group IV   | Class 1          | 491       |         |           | Subgroup III | 179       |
| PhiM.16   | KP793128      | p2-like  | Group IV   | Class 1          | 491       | Group A | 654       |              |           |
| Phi155    | KP793130      | p2-like  | Group IV   | Class 1          | 492       | Group B | 673       |              |           |
| PhiL.18   | KP793120      | p2-like  | Group IV   | Class 1          | 491       |         |           | Subgroup III | 179       |
| Phi16     | KP793135      | p2-like  | Group IV   | Class 1          | 491       |         |           | Subgroup III | 179       |
| Phi40     | KP793127      | p2-like  | Group IV   | Class 1          | 491       |         |           | Subgroup III | 179       |
| PhiM1127  | KP793132      | p2-like  | Group IV   | Class 1          | 492       |         |           | Subgroup III | 179       |
| PhiE1127  | KP793131      | p2-like  | Group IV   | Class 1          | 492       |         |           | Subgroup III | 179       |
| Phi91127  | KP793125      | p2-like  | Group IV   | Class 1          | 491       |         |           | Subgroup III | 220       |
| PhiM.5    | KP793126      | p2-like  | Group IV   | Class 1          | 491       |         |           | Subgroup III | 220       |
| PhiL.6    | KP793122      | p2-like  | Group IV   | Class 4          | 446       |         |           | Subgroup III | 223       |
| Phi8R06S  | KX346242      | p2-like  | Group IV   | Class 4          | 466       |         |           | Subgroup III | 180       |
| Phi16W12L | KX379672      | p2-like  | Group IV   | Class 1          | 492       |         |           | Subgroup III | 180       |
| Phi16W23  | KX346249      | p2-like  | Group IV   | Class 1          | 492       |         |           | Subgroup III | 180       |
| PhiMW18L  | KX379673      | p2-like  | Group IV   | Class 1          | 492       |         |           | Subgroup III | 180       |
| PhiMW18S  | KX346250      | p2-like  | Group IV   | Class 1          | 492       |         |           | Subgroup III | 180       |
| MP1       | MG779474      | p2-like  | Group IV   | Class 1          | 491       | Group A | 654       | Subgroup III | 220       |
| Phi19.3   | KP793105      | p2       | Group I    |                  |           | Group D | 728       |              |           |
| Phi19W07F | KX379670      | p2       | Group I    |                  |           | Group F | 862       |              |           |
| Phi19.2   | KP793111      | p2       | Group I    |                  |           | Group D | 728       |              |           |
| Phi15     | KM091442      | p2       | Group I    |                  |           | Group F | 862       |              |           |
| Phi13W11L | KX379671      | p2       | Group I    |                  |           | Group D | 728       |              |           |
| Phi114    | KP793115      | p2       | Group I    |                  |           | Group F | 862       |              |           |

| Phage     | Accession No. | RBP Head | RBP Group* | Dit <sup>†</sup> | Size (aa) | NPS     | Size (aa) | MTP         | Size (aa) |
|-----------|---------------|----------|------------|------------------|-----------|---------|-----------|-------------|-----------|
| Phi13.16  | KP793116      | p2       | Group I    |                  |           | Group D | 728       |             |           |
| Phi44     | KP793124      | p2       | Group I    |                  |           | Group F | 848       |             |           |
| ASCC395   | JQ740799      | p2       | Group I    |                  |           | Group E | 723       |             |           |
| ASCC406   | JQ740801      | p2       | Group I    |                  |           | Group E | 703       |             |           |
| ASCC397   | JQ740800      | p2       | Group I    |                  |           | Group E | 723       |             |           |
| ASCC476   | JQ740806      | p2       | Group I    |                  |           | Group E | 723       |             |           |
| ASCC460   | JQ740803      | p2       | Group I    |                  |           | Group E | 723       |             |           |
| ASCC506   | JQ740810      | p2       | Group I    |                  |           | Group E | 723       |             |           |
| 712       | DQ227763      | p2       | Group I    | Class 3          | 471       |         |           | Subgroup I  | 201       |
| ASCC191   | JQ740787      | p2       | Group I    |                  |           | Group E | 726       |             |           |
| Phi11W16L | KX346246      | p2       | Group I    |                  |           | Group D | 728       |             |           |
| PhiD.18   | KP793107      | p2       | Group I    |                  |           | Group C | 512       |             |           |
| i0139     | KX379665      | p2       | Group I    |                  |           | Group C | 512       |             |           |
| Phi129    | KP793112      | p2       | Group I    |                  |           | Group C | 512       |             |           |
| Phi43     | KP793110      | p2       | Group I    |                  |           | Group C | 512       |             |           |
| CB14      | FJ848883      | p2       | Group I    |                  |           | Group E | 734       |             |           |
| CB19      | FJ848884      | p2       | Group I    |                  |           | Group A | 656       |             |           |
| CB20      | FJ848885      | p2       | Group I    |                  |           | Group A | 656       |             |           |
| CB13      | FJ848882      | p2       | Group I    |                  |           | Group E | 723       |             |           |
| SL4       | FJ848881      | p2       | Group I    | Class 3          | 468       |         |           |             |           |
| Phi5.12   | KP793108      | p2       | Group I    |                  |           |         |           | Subgroup IV | 149       |
| ASCC273   | JQ740788      | p2       | Group I    |                  |           | Group E | 723       |             |           |
| ASCC287   | JQ740791      | p2       | Group I    |                  |           | Group E | 723       |             |           |
| ASCC454   | JQ740802      | p2       | Group I    |                  |           | Group E | 723       |             |           |
| Phi7      | KC182552      | p2       | Group I    |                  |           | Group G | 641       | Subgroup I  | 205       |
| ASCC324   | JQ740793      | p2       | Group I    |                  |           | Group E | 723       |             |           |
| ASCC502   | JQ740809      | p2       | Group I    |                  |           | Group E | 723       |             |           |
| ASCC337   | JQ740794      | p2       | Group I    |                  |           | Group E | 723       |             |           |
| ASCC527   | JQ740811      | p2       | Group I    |                  |           | Group E | 746       |             |           |
| ASCC544   | JQ740814      | p2       | Group I    |                  |           | Group E | 723       |             |           |
| ASCC368   | JQ740798      | p2       | Group I    |                  |           | Group E | 723       |             |           |
| jm2       | KC182546      | p2       | Group I    |                  |           | Group D | 728       |             |           |

| Phage           | Accession No. | RBP Head     | RBP Group* | Dit <sup>†</sup> | Size (aa) | NPS     | Size (aa) | MTP         | Size (aa) |
|-----------------|---------------|--------------|------------|------------------|-----------|---------|-----------|-------------|-----------|
| PhiS0139        | KP793134      | p2           | Group I    |                  |           | Group A | 651       |             |           |
| PhiF.17         | P793113       | p2           | Group I    |                  |           | Group A | 660       |             |           |
| PhiJF1          | KP793129      | p2           | Group I    |                  |           | Group A | 660       |             |           |
| PhiF0139        | KP793118      | p2           | Group I    |                  |           | Group A | 660       |             |           |
| fd13            | KC182545      | p2           | Group I    |                  |           | Group A | 650       |             |           |
| PhiG            | KP793117      | p2           | Group I    |                  |           | Group A | 656       |             |           |
| jj50            | DQ227764      | p2           | Group I    |                  |           |         |           |             |           |
| p2              | GQ979703      | p2           | Group I    |                  |           |         |           |             |           |
| sk1             | AF011378      | p2           | Group I    |                  |           |         |           |             |           |
| JM1             | KC522412      | p2           | Group I    |                  |           | Group B | 466       |             |           |
| Phi4.2 RBP2**   | KP793123      | p2           | Group I    |                  |           |         |           | Subgroup II | 226       |
| Phi4R16L RBP2** | KX379667      | p2           | Group I    |                  |           |         |           | Subgroup II | 226       |
| Phi4R15L RBP2** | KX379668      | p2           | Group I    |                  |           |         |           | Subgroup II | 226       |
| PhiB1127        | KP793104      | Tuc2009-like | Group V    |                  |           | Group C | 494       | Subgroup I  | 202       |
| PhiC0139        | KP793109      | Tuc2009-like | Group V    |                  |           | Group C | 520       | Subgroup I  | 202       |
| ASCC281         | JQ740789      | Tuc2009-like | Group V    |                  |           | Group G | 888       |             |           |
| ASCC358         | JQ740796      | Tuc2009-like | Group V    |                  |           | Group G | 888       |             |           |
| ASCC365         | JQ740797      | Tuc2009-like | Group V    |                  |           | Group G | 888       |             |           |
| ASCC473         | JQ740805      | Tuc2009-like | Group V    |                  |           | Group G | 888       |             |           |
| ASCC497         | JQ740808      | Tuc2009-like | Group V    |                  |           | Group G | 888       |             |           |
| ASCC489         | JQ740807      | Tuc2009-like | Group V    |                  |           | Group G | 888       |             |           |
| ASCC284         | JQ740790      | Tuc2009-like | Group V    |                  |           | Group G | 888       |             |           |
| ASCC310         | JQ740792      | Tuc2009-like | Group V    |                  |           | Group G | 888       |             |           |
| ASCC356         | JQ740795      | Tuc2009-like | Group V    |                  |           | Group G | 888       |             |           |
| ASCC532         | JQ740812      | Tuc2009-like | Group V    |                  |           | Group G | 888       |             |           |
| bIL170          | AF009630      | bIL170       | Group II   |                  |           | Group A | 653       |             |           |
| P272            | KC182549      | bIL170       | Group II   |                  |           |         |           | Subgroup I  | 206       |
| P113G           | KC182548      | bIL170       | Group II   |                  |           |         |           | Subgroup I  | 206       |
| p680            | KC182551      | bIL170       | Group II   |                  |           | Group B | 664       |             |           |
| p008            | DQ054536      | bIL170       | Group II   |                  |           | Group G | 145       |             |           |
| 936             | KC182544      | bIL170       | Group II   |                  |           |         |           |             |           |
| Phi10.5         | KP793119      | T4 gp10      | Group III  | Class 2          | 486       |         |           |             |           |

| Phage     | Accession No. | RBP Head | RBP Group* | Dit <sup>†</sup> | Size (aa) | NPS     | Size (aa) | MTP         | Size (aa) |
|-----------|---------------|----------|------------|------------------|-----------|---------|-----------|-------------|-----------|
| Phi2R14S  | KX346236      | T4 gp12  | Group III  | Class 2          | 486       |         |           |             |           |
| Phi3R07S  | KX346241      | T4 gp12  | Group III  | Class 2          | 486       |         |           |             |           |
| Phi2R15M  | KX346237      | T4 gp12  | Group III  | Class 2          | 486       |         |           |             |           |
| Phi2R15S  | KX346238      | T4 gp12  | Group III  | Class 2          | 486       | Group B | 533       |             |           |
| Phi2R06A  | KX346240      | T4 gp12  | Group III  | Class 2          | 486       |         |           | Subgroup IV | 221       |
| Phi10W22S | KX379669      | T4 gp12  | Group III  | Class 2          | 486       |         |           |             |           |
| Phi10W24  | KX346245      | T4 gp12  | Group III  | Class 2          | 486       |         |           |             |           |
| Phi17W12M | KX346248      | T4 gp12  | Group III  | Class 2          | 486       | Group B | 533       |             |           |
| Phi17W11  | KX346247      | T4 gp12  | Group III  | Class 2          | 486       |         |           |             |           |
| Phi6W06   | KX346243      | T4 gp12  | Group III  | Class 2          | 486       | Group B | 533       |             |           |
| Phi3R16S  | KX379666      | T4 gp12  | Group III  | Class 2          | 486       |         |           |             |           |
| Phi6W18L  | KX346244      | T4 gp12  | Group III  | Class 2          | 486       |         |           |             |           |
| Phi2R15S2 | KX346239      | T4 gp12  | Group III  | Class 2          | 486       |         |           |             |           |
| Phi10W18  | KX379664      | T4 gp12  | Group III  | Class 2          | 486       | Group B | 533       |             |           |
| 340       | KC182542      | T4 gp12  | Group III  |                  |           | Group F | 880       |             |           |
| 645       | KC182543      | T4 gp12  | Group III  |                  |           | Group F | 880       |             |           |
| bIBB29    | EU221285      | T4 gp12  | Group III  | Class 2          | 486       |         |           |             |           |
| P475      | KC182550      | T4 gp12  | Group III  |                  |           |         |           | Subgroup I  | 207       |

\*As determined previously [2, 3]. <sup>†</sup>Dit class as determined previously [4]. \*\*These phages possess two RBPs. RBP1, the unique elongated protein, does not fit in to any previously determined RBP group.

**Supplementary Table S2.** Bacterial strains used in this study.

| Bacterial Strain                         | Source |
|------------------------------------------|--------|
| <i>Lactococcus lactis</i> strains A - T  | [5]    |
| <i>Lactococcus lactis</i> strains 1 - 20 | [5]    |
| NZ9000                                   | [6]    |
| IL1403                                   | [7]    |
| ASCC92                                   | [8]    |
| ASCC385                                  | [8]    |
| E8                                       | [9]    |

**Supplementary Table S3.** Primers used for CWPS typing multiplex PCR and their expected product sizes.**CWPS Type PCR**

| CWPS Type | Primer  | Sequence (5'-3')             | Amplicon Size (bp) |
|-----------|---------|------------------------------|--------------------|
| A         | UC-CVfw | GTGCCTATGCTCCGTTAGTC         | 442                |
|           | UC-CVrv | CGAGGGCCAATCTCTTTACC         |                    |
| B         | IL-KFfw | GATTCAGTTGCACGGCCG           | 183                |
|           | IL-KFrv | AGTAAGGGGGCGGATTGTG          |                    |
| C         | MG-SKfw | AAAGCTCATCTTTCCCCTGTTGT      | 686                |
|           | MG-SKrv | GCACCATAGTCTGGAATAAGACC      |                    |
| Control   | CONfw   | GTACACTATGTTTATAACAATCATCCAG | 891                |
|           | CONrv   | GCAAACCAGATTCAAAGTCAGTATG    |                    |

**C Type CWPS Subtype PCR**

| CWPS Type      | Primer | Sequence (5'-3')        | Amplicon Size (bp) |
|----------------|--------|-------------------------|--------------------|
| C <sub>1</sub> | C1-fw  | GTCATCAAACATACTTTCGTC   | 650                |
|                | C1-rv  | AAGTTTTGCCATTGTTTCTCC   |                    |
| C <sub>2</sub> | C2-fw  | GAACAATGGATTATTTATGCTGA | 450                |
|                | C2-rv  | ATTCCCATTTTCAGCAACAAG   |                    |
| C <sub>3</sub> | C3-fw  | GTTGTAATTGTTACTAGCCAG   | 250                |
|                | C3-rv  | TCAATCGCATTATAGATTACACC |                    |
| C <sub>4</sub> | C4-fw  | GATTTTATTCGAGGCTTAGCA   | 968                |
|                | C4-rv  | TAGCATTACAATCAATCTGTCA  |                    |
| C <sub>5</sub> | C5-fw  | GATTATATTCGGGGCTTAGCA   | 1141               |
|                | C5-rv  | TGTAATATGGTATTGTCTAGCA  |                    |

Data set 1

**PhiA.16-NPS (1440 bp)**

ATGGGAGTTAGCAAAGGTGAAGAAGTGTTCACGGGCGTTGTGCCGATCCTGGTGGAAGTGGACGGTGA  
TGTTAATGGTCATAAATTCTCTGTGAGTGGCGAAGGTGAAGGCGATGCGACCTATGGTAAACTGACGC  
TGAAATTTATTTGCACCACCGGTAAACTGCCGGTTCCGTGGCCGACCCTGGTCACCACCCTGACCTAC  
GGTGTGCAGTGTTCGCACGCTATCCGGATCATATGAAACAACACGACTTTTTCAAAGCGCTATGCC  
GGAAGTTACGTTACGGAACGTACCATTTTCTTTAAAGATGACGGCAACTACAAAACCCGCGCCGAAG  
TCAAATTTGAAGGTGATACGCTGGTGAACCGTATTGAACTGAAAGGCATCGATTTCAAAGAAGACGGT  
AATATCCTGGGCCATAAAGTGAATACAACCTACAACCTCACACAAAGTTTACATTACCGCGGATAAACA  
GAAAAACGGTATCAAAGTCAACTTCAAACCGCGTCATAACATCGAAGATGGCTCTGTGCAACTGGCCG  
ACCACTACCAGCAAACACCCCGATCGGTGATGGCCCGGTTCTGCTGCCGACAATCATTATCTGTCC  
ACCCAGTCAGCACTGTTCGAAAGATCCGAATGAAAAACGCGACCACATGGTGCTGCTGGAATTTGTTAC  
CGCGGCCGGTATTACGCTGGGCATGGATGAACTGTACAAAAGCTCTGGTCCATCGGGCAGCAGCCATC  
ATCATCATCATCACAGCAGCGGCCCTCAGCaaggGCTGAGGGAAAACCTGTACTTCCAGGGCGATGAC  
GGAGTTGTAAATACCATTGCCTATGCCAATAGCGCAGACGGTACTGACGGTTTTACGACTGTTTTATCC  
TAATTTGAATCTGTTGAATAATACACGTGATTATGCTGGATGGACATTTTATCGCACAGAAATATTAG  
AAGCGGATGGAACGCCTACTAAGATTCTTAAAATTAATTACGATCCTAACGCTTGGGCAGGTGGATCT  
TCACCCAATATCATTAGTCAGTAAGACCTAAACCTGGCGATACAGTTACTCTTAGTTTCTATGCAA  
AGGACATGGTAGGGTTTTATTCTACTATTGACGGTGTAAATGGAGCAATTAGCGCCGATGCTACTGATG  
ATTGGAAGCTTTACAAGTTGACTGGGGTGGCTACGAAAAGTTTCATAGTGTGCTATCTATCTACAC  
AACGTTGACAAGACATCAACAAGCATTATGTTTATTCCGTTAAAATAGAAAAGGCTCAACCGCCAC  
CCCTTGGATGCCATCAGCTAGCGAAGTAACAATAAATGACTATCCGAAGTATGTGGGGTTTAGTAATA  
GCATTAACCAAATAAGAAAAATCTGATTACAAATGGCTACCAATGGGGTTAGTGTCAATTGATAGG  
GTTACAGGCTAA

**Phi2R06A-MTP (1467 bp)**

ATGGGAGTTAGCAAAGGTGAAGAAGTGTTCACGGGCGTTGTGCCGATCCTGGTGGAAGTGGACGGTGA  
TGTTAATGGTCATAAATTCTCTGTGAGTGGCGAAGGTGAAGGCGATGCGACCTATGGTAAACTGACGC  
TGAAATTTATTTGCACCACCGGTAAACTGCCGGTTCCGTGGCCGACCCTGGTCACCACCCTGACCTAC  
GGTGTGCAGTGTTCGCACGCTATCCGGATCATATGAAACAACACGACTTTTTCAAAGCGCTATGCC  
GGAAGTTACGTTACGGAACGTACCATTTTCTTTAAAGATGACGGCAACTACAAAACCCGCGCCGAAG  
TCAAATTTGAAGGTGATACGCTGGTGAACCGTATTGAACTGAAAGGCATCGATTTCAAAGAAGACGGT  
AATATCCTGGGCCATAAAGTGAATACAACCTACAACCTCACACAAAGTTTACATTACCGCGGATAAACA  
GAAAAACGGTATCAAAGTCAACTTCAAACCGCGTCATAACATCGAAGATGGCTCTGTGCAACTGGCCG  
ACCACTACCAGCAAACACCCCGATCGGTGATGGCCCGGTTCTGCTGCCGACAATCATTATCTGTCC  
ACCCAGTCAGCACTGTTCGAAAGATCCGAATGAAAAACGCGACCACATGGTGCTGCTGGAATTTGTTAC  
CGCGGCCGGTATTACGCTGGGCATGGATGAACTGTACAAAAGCTCTGGTCCATCGGGCAGCAGCCATC  
ATCATCATCATCACAGCAGCGGCCCTCAGCaaggGCTGAGGGAAAACCTGTACTTCCAGGGCGCGCCC  
GACGGGGCTAACACGTAGCCTTTGCGTATAGCGCAGACGGAAAAGATAGATTCACGACTGTCTATCC  
GAATTTGAATTTGTTAAAAACACGAGAACGACATCGGCAACTTCAACTTCATCAGCTTGGAGTACTT  
TATTTAATTCTGAACAAATATATGACTCCGAAATTAATCTAAAACCTGGAGTTTCAGCAATGAACCTT  
AGTTTCGATGTTTCTGTACCATTGAATACTAAAGTTGGAGATAATATTTCTGTCCAGCTTAAAGGTCA  
AAATTTCTCAAGCTCATGGAAATGTTGGATCCAATGATTTCAACACAATTGTTGGTGAAAAGTGGCATA  
ATATTGAACAAAGCGATTTAGGTAAAACAATTCGTTTAAAGCACTTCAGTGAATTAGATCCTAAATAT  
CATTCTTTTGATACTGCTTTAGCTGATACTGATAGTATTACTATTAGACAAATCAAAGACACGCCAGG  
ACTTGTGTATTCTAAATTAACCTTGAAGAAGGTTCAACCGCAACTCCTTGGATGCCCTCAGCTAGTG  
AAGTAACAGCCGAAGATTATCCAAGCTATATAGGAACATATACTGATAAAAACCTCCAATGAACAAAGT  
ACAGACCCAGAAAAATATACTTGGAAAAAATAGAATAA

## References

1. Corpet, F., Multiple sequence alignment with hierarchical clustering. *Nucleic acids research* **1988**, 16, (22), 10881-10890.
2. Mahony, J.; Kot, W.; Murphy, J.; Ainsworth, S.; Neve, H.; Hansen, L. H.; Heller, K. J.; Sørensen, S. J.; Hammer, K.; Cambillau, C., Investigation of the relationship between lactococcal host cell wall polysaccharide genotype and 936 phage receptor binding protein phylogeny. *Applied and environmental microbiology* **2013**, AEM. 00653-13.
3. Murphy, J.; Bottacini, F.; Mahony, J.; Kelleher, P.; Neve, H.; Zomer, A.; Nauta, A.; van Sinderen, D., Comparative genomics and functional analysis of the 936 group of lactococcal Siphoviridae phages. *Scientific reports* **2016**, 6.
4. Hayes, S.; Vincentelli, R.; Mahony, J.; Nauta, A.; Ramond, L.; Lugli, G. A.; Ventura, M.; van Sinderen, D.; Cambillau, C., Functional Carbohydrate Binding Modules Identified in evolved Dits from Siphophages Infecting various Gram-positive Bacteria. *Molecular microbiology* **2018**.
5. Murphy, J.; Royer, B.; Mahony, J.; Hoyles, L.; Heller, K.; Neve, H.; Bonestroo, M.; Nauta, A.; van Sinderen, D., Biodiversity of lactococcal bacteriophages isolated from 3 Gouda-type cheese-producing plants. *Journal of dairy science* **2013**, 96, (8), 4945-4957.
6. Kuipers, O. P.; de Ruyter, P. G.; Kleerebezem, M.; de Vos, W. M., Quorum sensing-controlled gene expression in lactic acid bacteria. *Journal of Biotechnology* **1998**, 64, (1), 15-21.
7. Bolotin, A.; Wincker, P.; Mauger, S.; Jaillon, O.; Malarne, K.; Weissenbach, J.; Ehrlich, S. D.; Sorokin, A., The complete genome sequence of the lactic acid bacterium *Lactococcus lactis* ssp. *lactis* IL1403. *Genome research* **2001**, 11, (5), 731-753.
8. Castro-Nallar, E.; Chen, H.; Gladman, S.; Moore, S. C.; Seemann, T.; Powell, I. B.; Hillier, A.; Crandall, K. A.; Chandry, P. S., Population genomics and phylogeography of an Australian dairy factory derived lytic bacteriophage. *Genome biology and evolution* **2012**, 4, (3), 382-393.
9. Gopal, P. K.; Crow, V. L., Characterization of loosely associated material from the cell surface of *Lactococcus lactis* subsp. *cremoris* E8 and its phage-resistant variant strain 398. *Applied and environmental microbiology* **1993**, 59, (10), 3177-3182.
